# Supplementary material
Source: PubMed Central journal article supplement (PMC4769668)

Figure S2. Restricted cubic spline of dietary vitamin C intake and risk of incident kidney stones: Health Professionals Follow-up Study. Model adjusted for age, BMI, thiazide use, use of calcium supplements, intake of calcium, sodium, potassium, magnesium, fructose, oxalate, phytate, animal protein, total fluid and alcohol.

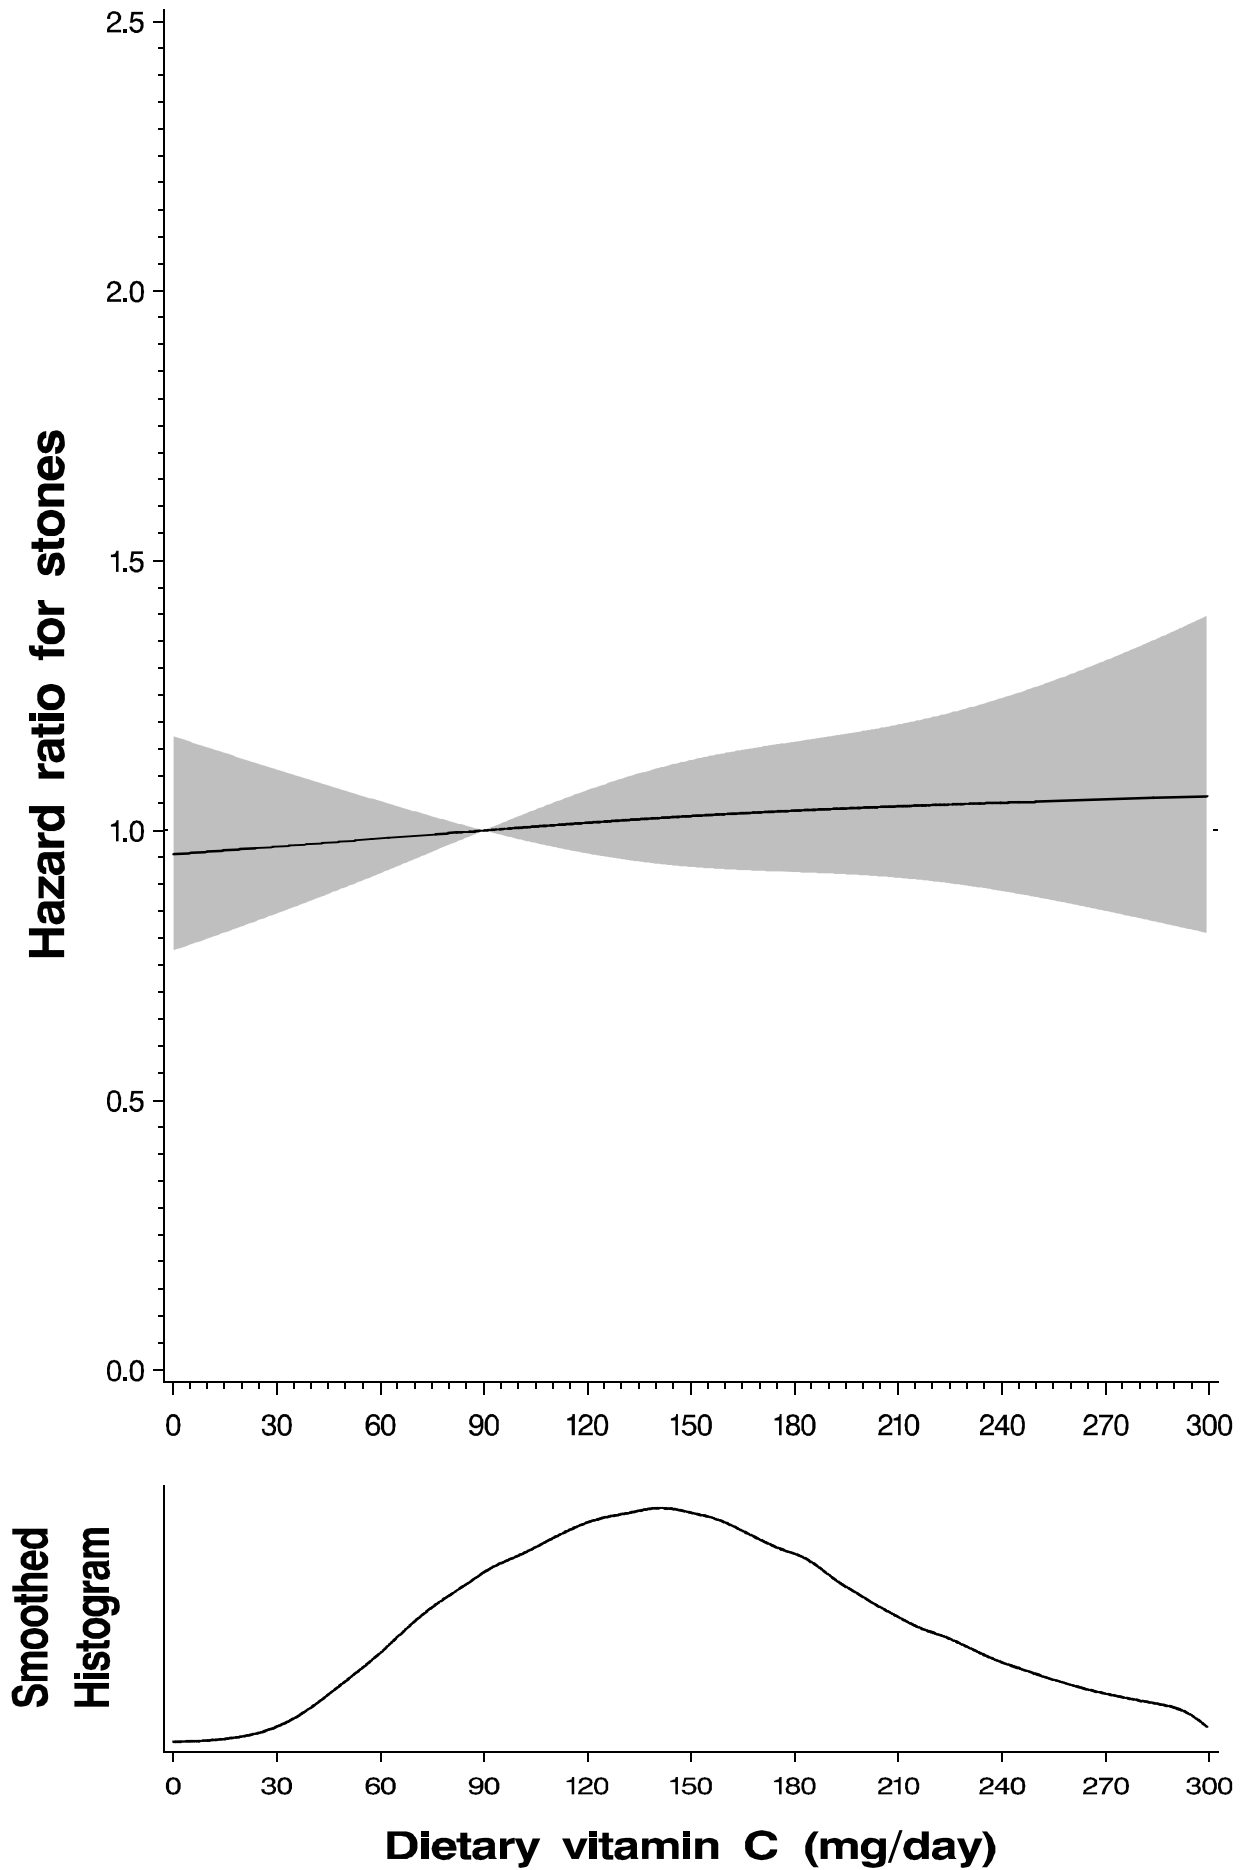

Supplement: NIHMS725119-supplement-2.pdf [file NIHMS725119-supplement-2.pdf]
