# Supplementary material
Source: PubMed Central journal article supplement (PMC4769668)

Figure S3. Restricted cubic spline of supplemental vitamin C intake and risk of incident kidney stones: Nurses' Health Studies I and II. Model adjusted for age, BMI, thiazide use, use of calcium supplements, intake of dietary vitamin C, calcium, sodium, potassium, magnesium, fructose, oxalate, phytate, animal protein, total fluid and alcohol.

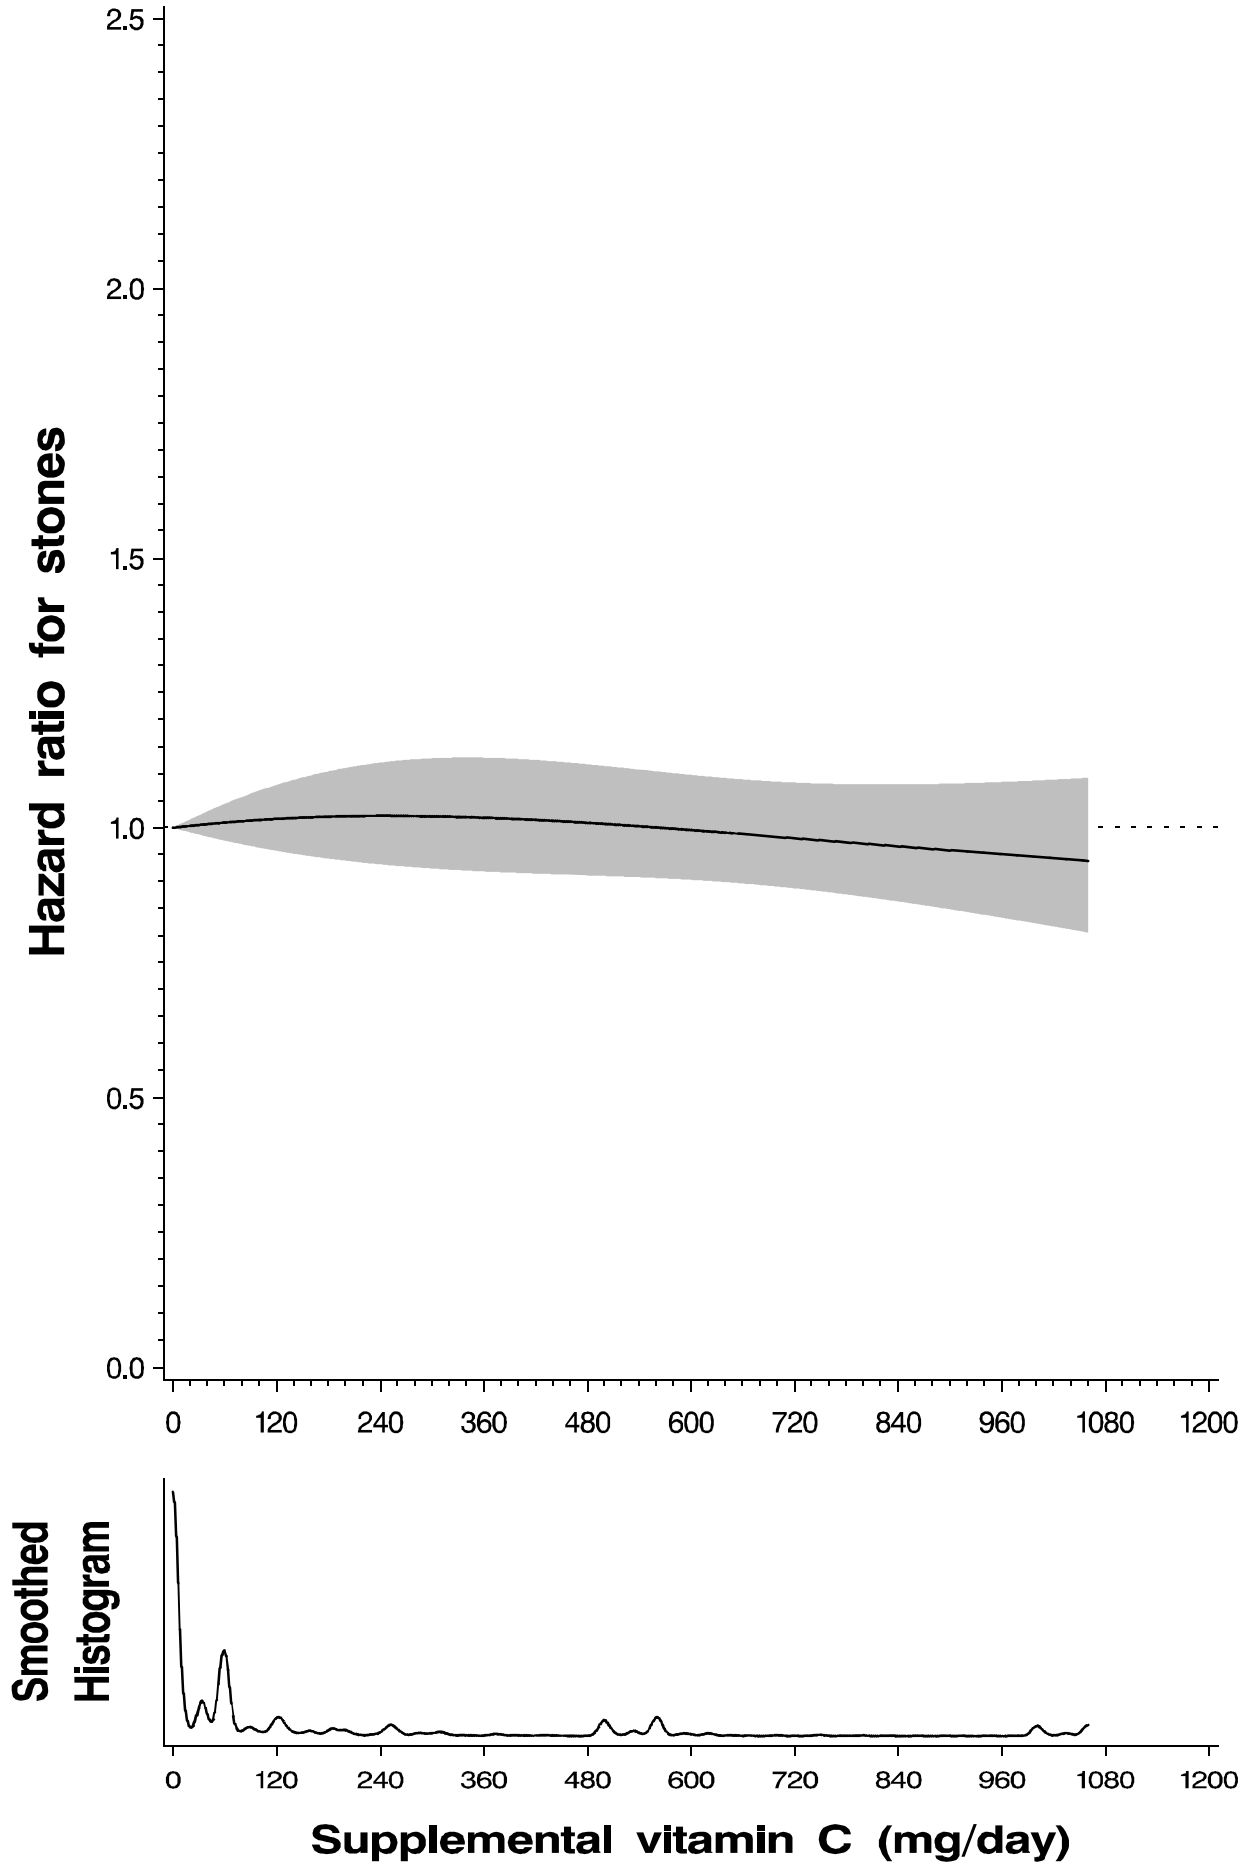

Supplement: NIHMS725119-supplement-3.pdf [file NIHMS725119-supplement-3.pdf]
