# Supplementary material
Source: PubMed Central journal article supplement (PMC4769668)

Figure S4. Restricted cubic spline of supplemental vitamin C intake and risk of incident kidney stones: Health Professionals Follow-up Study. Model adjusted for age, BMI, thiazide use, use of calcium supplements, intake of dietary vitamin C, calcium, sodium, potassium, magnesium, fructose, oxalate, phytate, animal protein, total fluid and alcohol.

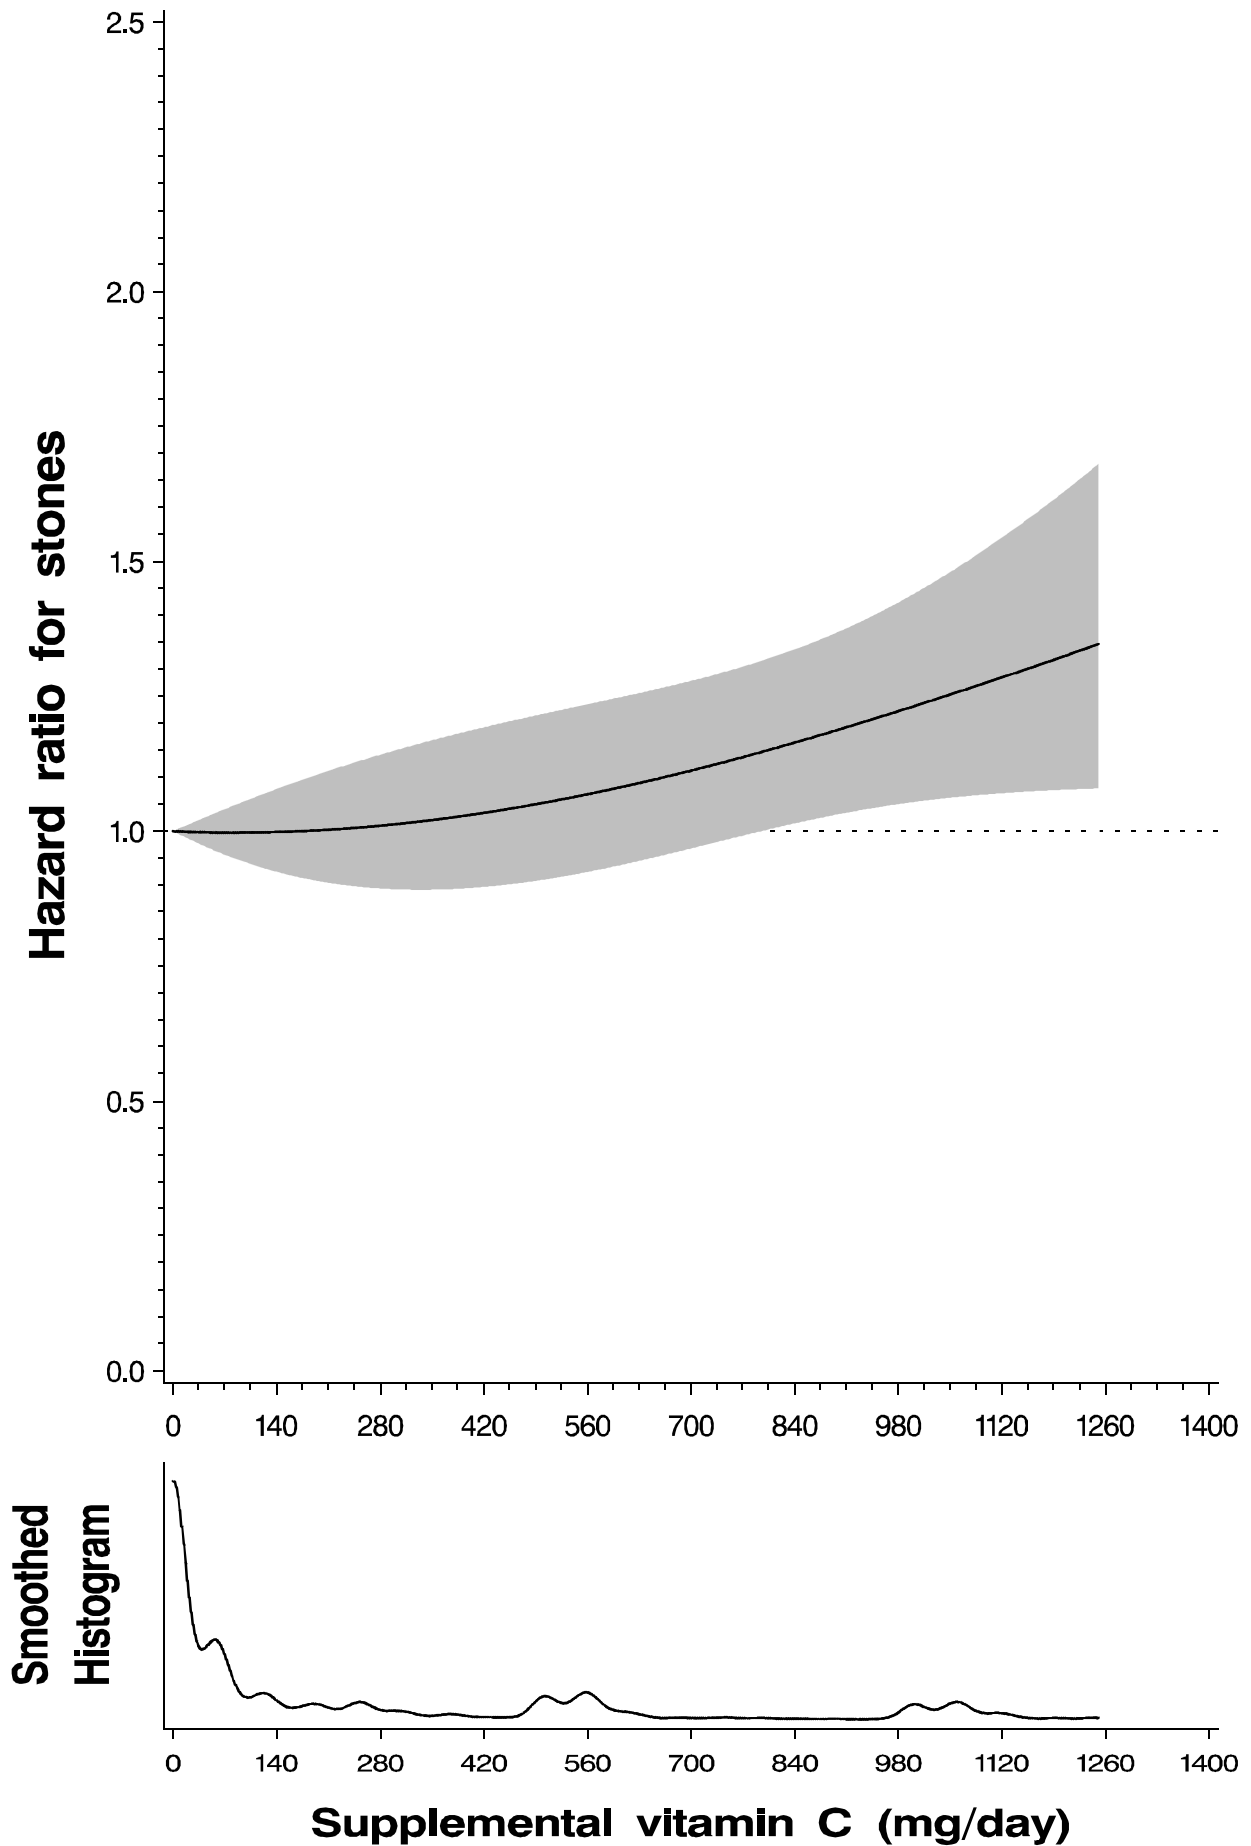

Supplement: NIHMS725119-supplement-4.pdf [file NIHMS725119-supplement-4.pdf]
