# Supplementary material
Source: PubMed Central journal article supplement (PMC4769668)
Supplement: NIHMS725119-supplement-5.pdf [file NIHMS725119-supplement-5.pdf]

**Table S1** Hazard ratios and 95% confidence intervals of incident kidney stones by categories of dietary intake of vitamin C in the Nurses' Health Studies I and II and Health Professionals Follow-up Study cohorts

|                                        | Category of dietary vitamin C intake (mg/day) |                   |                   | p-value for trend |
|----------------------------------------|-----------------------------------------------|-------------------|-------------------|-------------------|
|                                        | <90                                           | 90-249            | ≥250              |                   |
| <b>NHS I and II</b>                    |                                               |                   |                   |                   |
| Median diet. vitamin C intake (mg/day) | 71 / 72                                       | 147 / 135         | 286 / 285         |                   |
| Cases                                  | 1,205                                         | 3,042             | 145               |                   |
| Person-time (years)                    | 600,429                                       | 1,774,987         | 119,373           |                   |
| Age-adjusted HR (95% CI)               | 1.00 (Ref.)                                   | 0.92 (0.86, 0.98) | 0.68 (0.56, 0.83) | <0.001            |
| Multivariable HR (95% CI)              | 1.00 (Ref.)                                   | 1.11 (1.02, 1.20) | 0.92 (0.68, 1.24) | 0.3               |
| <b>HPFS</b>                            |                                               |                   |                   |                   |
| Median diet. vitamin C intake (mg/day) | 71                                            | 155               | 297               |                   |
| Cases                                  | 343                                           | 1,349             | 161               |                   |
| Person-time (years)                    | 90,169                                        | 456,181           | 68,678            |                   |
| Age-adjusted HR (95% CI)               | 1.00 (Ref.)                                   | 0.83 (0.73, 0.93) | 0.69 (0.57, 0.84) | 0.001             |
| Multivariable HR (95% CI)              | 1.00 (Ref.)                                   | 0.96 (0.84, 1.10) | 0.95 (0.75, 1.19) | 0.7               |

Multivariable analysis adjusted for age, BMI, thiazide use, supplemental vitamin C intake, supplemental calcium intake, intake of dietary calcium, sodium, potassium, magnesium, fructose, oxalate, phytate, animal protein, total fluid and alcohol. For illustrative purposes, medians for dietary vitamin C were derived from responses to the 1986 (NHS I, HPFS) and 1991 (NHS II) dietary questionnaires. However, dietary vitamin C intake was updated throughout the study. CI, confidence interval; HPFS, Health Professionals Follow-up Study; HR, hazard ratio; NHS, Nurses' Health Study
